# Supplementary material for: MESSAGEix-GLOBIOM nexus module: integrating water sector and climate impacts
Source: Copernicus journal article supplement (doi:10.5194/gmd-17-2447-2024), 2024-03-28
Supplement: Supplementary file 1 [file gmd-17-2447-2024-supplement.pdf]

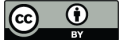

*Supplement of*

## **MESSAGEix-GLOBIOM nexus module: integrating water sector and climate impacts**

**Muhammad Awais et al.**

*Correspondence to:* Muhammad Awais (awais@iiasa.ac.at)

The copyright of individual parts of the supplement might differ from the article licence.

## 15 S1 Scales – Spatial & Temporal

The detailed methodology of spatial and temporal aggregation are mentioned in the main text. However, the following table provides additional details and steps used in post-processing the gridded data for use in nexus module. Also the bias adjustment of the data is done for the different scenarios of the data basically to keep the 2020 year same. Then the difference between both scenarios is applied over the time series as the adjustment in the base year (See Step 4 below). The names of B210 basins and their mapping with R11 region can be found in the model folder (data/node/B210\_R11.yaml)

**Table S1** Steps used to process the gridded data within the nexus module

| Step No. | Scale    | Input                  | Output                                      | Procedure                                                                                                                                                                                                                                                                                                                                                                                                                                                                                                                                                                                                                                                                                                                                                                                                                                                                                                                                                                                                                                                                                                                                                                                                          |
|----------|----------|------------------------|---------------------------------------------|--------------------------------------------------------------------------------------------------------------------------------------------------------------------------------------------------------------------------------------------------------------------------------------------------------------------------------------------------------------------------------------------------------------------------------------------------------------------------------------------------------------------------------------------------------------------------------------------------------------------------------------------------------------------------------------------------------------------------------------------------------------------------------------------------------------------------------------------------------------------------------------------------------------------------------------------------------------------------------------------------------------------------------------------------------------------------------------------------------------------------------------------------------------------------------------------------------------------|
| 1        | Spatial  | gridded                | gridded                                     | Convert kg/m2/sec to km3/ yr. and moving monthly average                                                                                                                                                                                                                                                                                                                                                                                                                                                                                                                                                                                                                                                                                                                                                                                                                                                                                                                                                                                                                                                                                                                                                           |
|          | Temporal | monthly                | monthly                                     |                                                                                                                                                                                                                                                                                                                                                                                                                                                                                                                                                                                                                                                                                                                                                                                                                                                                                                                                                                                                                                                                                                                                                                                                                    |
| 2        | Spatial  | gridded                | basin                                       | Spatial sum of grid values over basin                                                                                                                                                                                                                                                                                                                                                                                                                                                                                                                                                                                                                                                                                                                                                                                                                                                                                                                                                                                                                                                                                                                                                                              |
|          | Temporal | monthly                | monthly                                     |                                                                                                                                                                                                                                                                                                                                                                                                                                                                                                                                                                                                                                                                                                                                                                                                                                                                                                                                                                                                                                                                                                                                                                                                                    |
| 3        | Spatial  | basin                  | basin                                       | $\text{Val}_{2020} = (\text{avg. val}_{2015-2030 \text{ rcp } 2.6} + \text{avg. val}_{2015-2030 \text{rcp}60.})/2$ <p><math>\text{Val}_{2020}</math> is applied to all data frames at this point. <math>\text{Val}_{2020}</math> is monthly 2020 data</p> <p>Monthly bias correction is applied for each rcp value to adjust for the previous step. The bias correction is only done at 5 year intervals monthly data. For the 5 year average, MESSAGEix time step formulation is used such that for example ; <math>\text{val}_{2025} = (\text{val}_{2021} + \dots + \text{val}_{2025})/5</math></p> <p>Now for <math>\text{val}_{2025}</math>, bias correction is done as;</p> $\text{delta}_{\text{rcp}6} = \text{avg. val}_{2015-2030 \text{ rcp } 6} - \text{val}_{2020}$ $\text{delta}_{\text{rcp}2.6} = \text{avg. val}_{2015-2030 \text{ rcp } 2.6} - \text{val}_{2020}$ $\text{val}_{\text{rcp } 6 \text{ bias corrected}} = \text{val}_{\text{rcp } 6} + \text{delta}_{\text{rcp}6}$ $\text{val}_{\text{rcp } 2.6 \text{ bias corrected}} = \text{val}_{\text{rcp } 2.6} + \text{delta}_{\text{rcp}2.6}$ <p>the delta is reduced by 0.2 in each 5 year interval until the delta reaches zero in 2045</p> |
|          | Temporal | monthly                | monthly (same 2020 value for rcp scenarios) |                                                                                                                                                                                                                                                                                                                                                                                                                                                                                                                                                                                                                                                                                                                                                                                                                                                                                                                                                                                                                                                                                                                                                                                                                    |
| 4        | Spatial  | basin                  | basin                                       |                                                                                                                                                                                                                                                                                                                                                                                                                                                                                                                                                                                                                                                                                                                                                                                                                                                                                                                                                                                                                                                                                                                                                                                                                    |
|          | Temporal | monthly                | monthly bias corrected                      |                                                                                                                                                                                                                                                                                                                                                                                                                                                                                                                                                                                                                                                                                                                                                                                                                                                                                                                                                                                                                                                                                                                                                                                                                    |
| 5        | Spatial  | basin                  | basin                                       | 5 year monthly data is prepared from monthly bias corrected data by just filtering the 5 year timesteps (2020,2025,...) from the previous step                                                                                                                                                                                                                                                                                                                                                                                                                                                                                                                                                                                                                                                                                                                                                                                                                                                                                                                                                                                                                                                                     |
|          | Temporal | monthly bias corrected | 5 year monthly                              |                                                                                                                                                                                                                                                                                                                                                                                                                                                                                                                                                                                                                                                                                                                                                                                                                                                                                                                                                                                                                                                                                                                                                                                                                    |
| 6        | Spatial  | basin                  | basin                                       | Three reliability scenarios are created; $\text{val}_{q50}$ , $\text{val}_{q70}$ , $\text{val}_{q90}$ by taking quantiles of monthly bias corrected data .                                                                                                                                                                                                                                                                                                                                                                                                                                                                                                                                                                                                                                                                                                                                                                                                                                                                                                                                                                                                                                                         |
|          | Temporal | monthly bias corrected | 5 year annual                               |                                                                                                                                                                                                                                                                                                                                                                                                                                                                                                                                                                                                                                                                                                                                                                                                                                                                                                                                                                                                                                                                                                                                                                                                                    |

25

## S2 Water Resources

Some selected basins are shown here as an example. However complete data can be accessed in the GitHub repository under data/water/availability where all of the post-processed hydrological data are available.

30

### S2.1 Hydrology

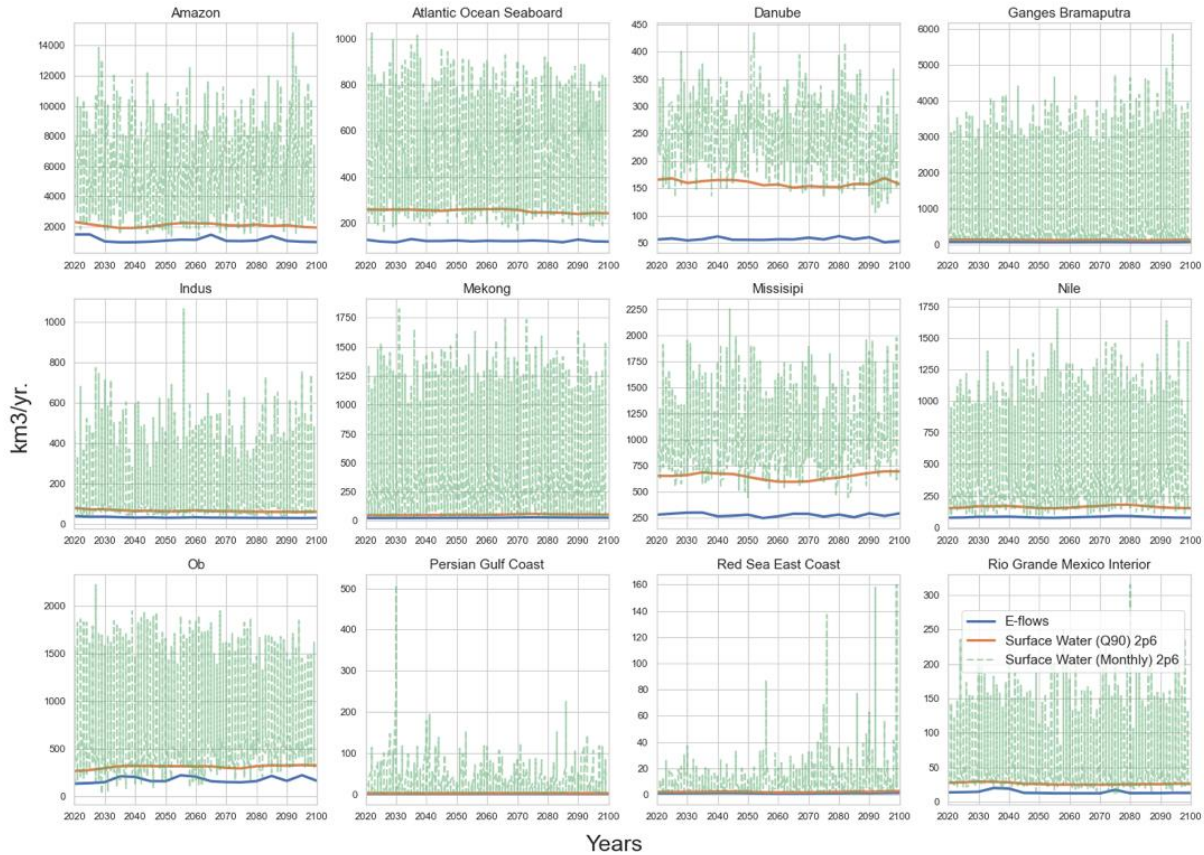

**Figure S1** shows the hydrological data used within the nexus module for major B210 basins within the nexus module. Q90 flows which are used as a high reliability scenario, and environmental flows are overlaid on the monthly profiles of time-series to show the reliability of water across the season and over a long time horizon.

35

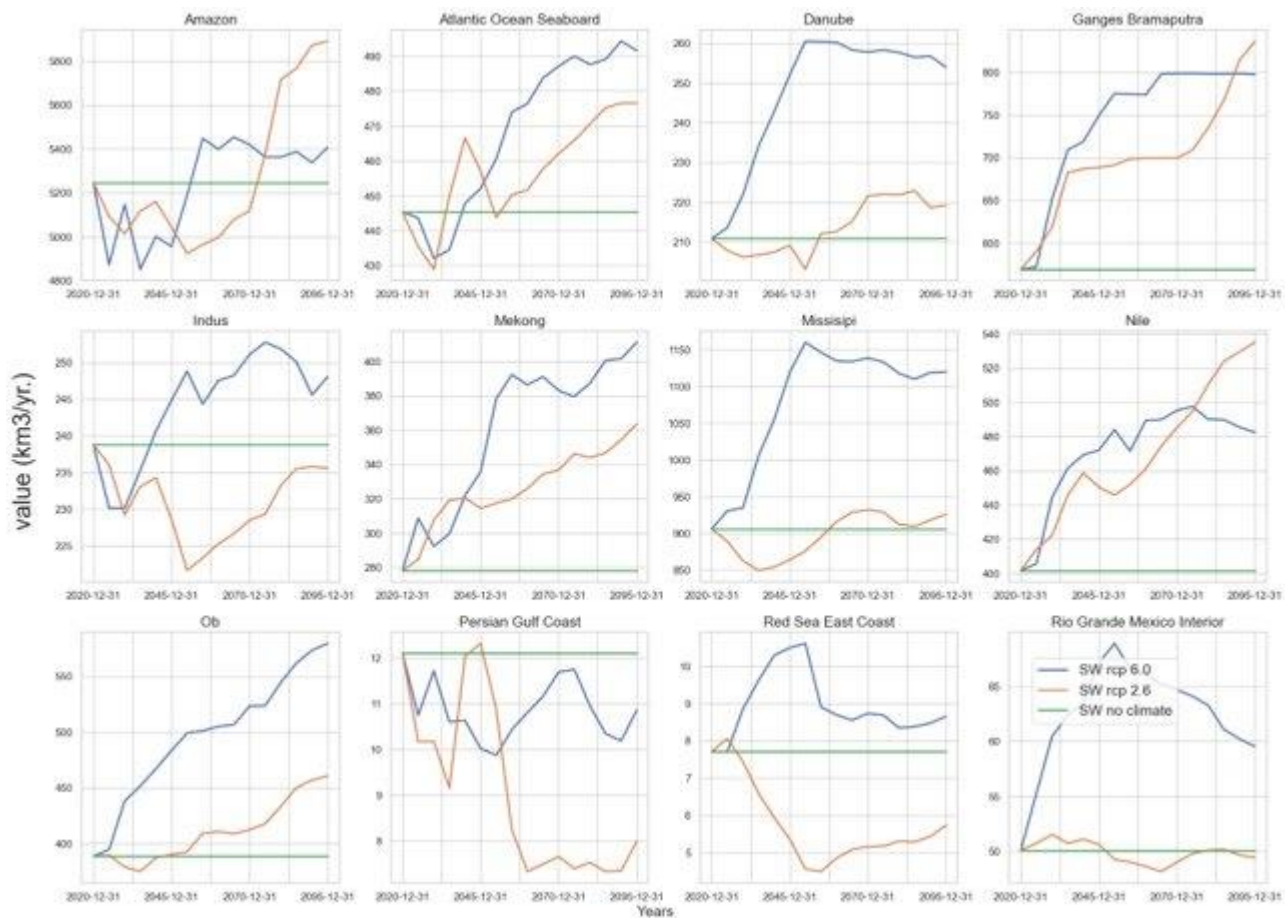

40 **Figure S2:** Hydrological flows for different climate scenarios for major B210 basins across timeseries

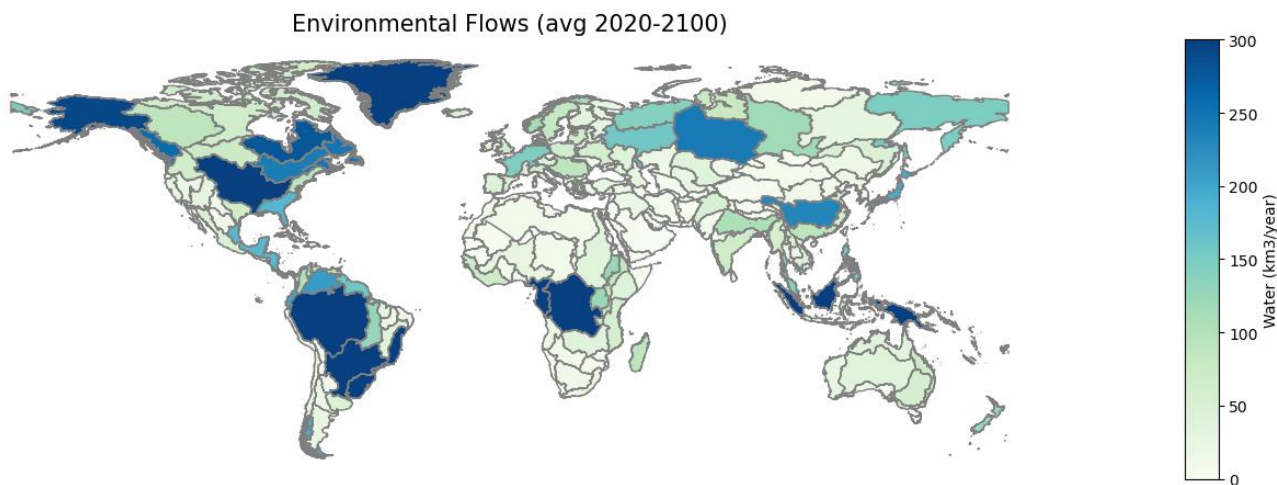

**Figure S3** shows average (2020-2100) environmental flows within B210 basins

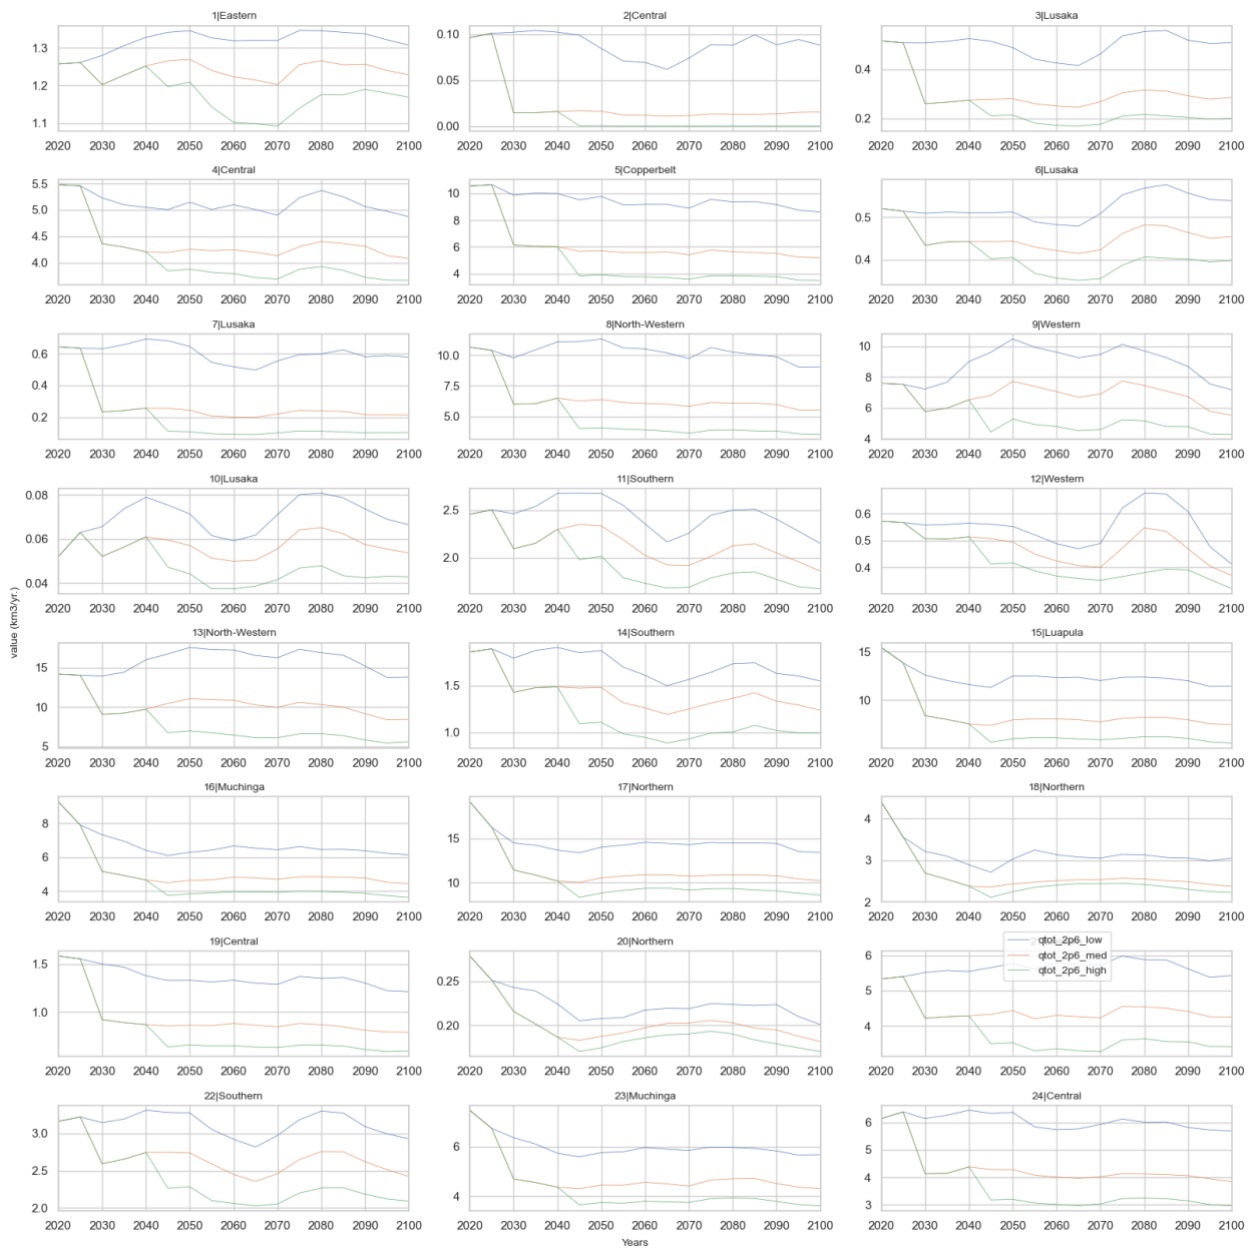

45 **Figure S4** shows the reliability scenarios for the Zambian sub-regions. Per section 3.4 of the main paper, the global model is downscaled to Zambia on a similar structure.

### S3 Exogenous Water Demands

#### 50 S3.1 Municipal water demands

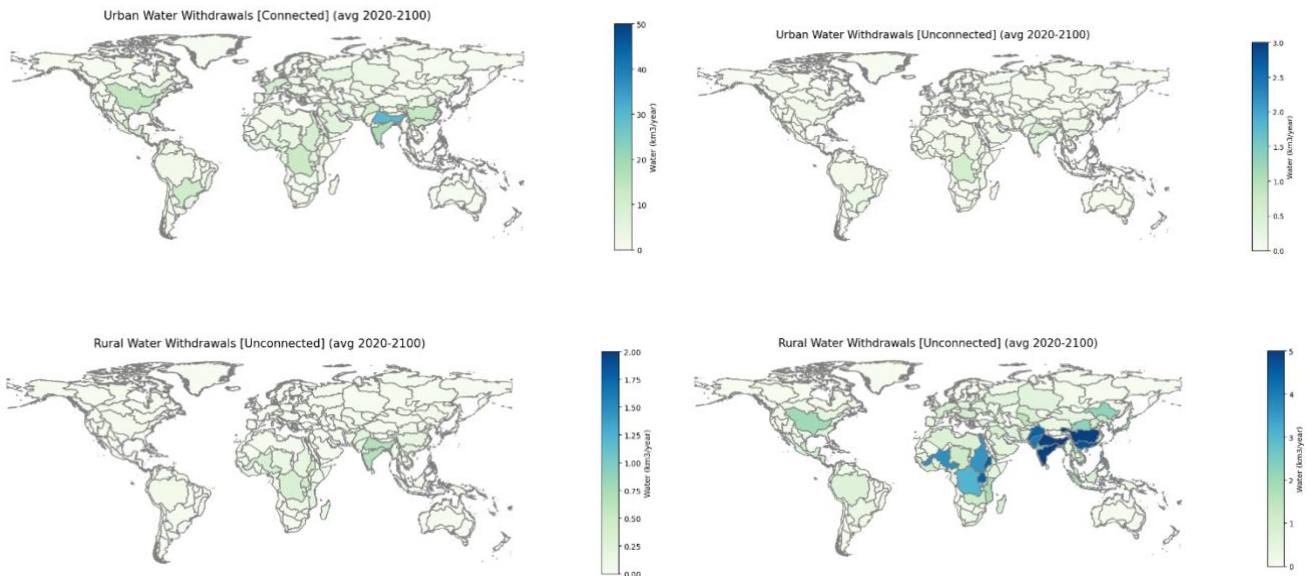

**Figure S5** Average municipal withdrawals (Urban, Rural (Connected & Unconnected) ) for B210 basins. The complete data is available in the GitHub repository under data/water/water\_demands

#### S3.2 Industrial water demands

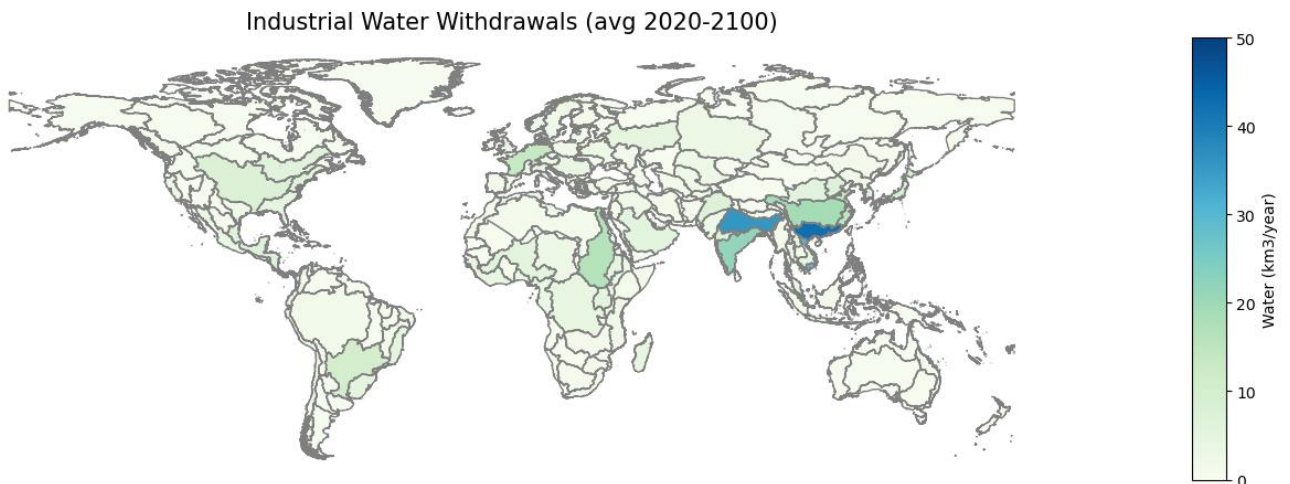

55

**Figure S6** Average industrial water withdrawals

### S3.3 Water Infrastructure

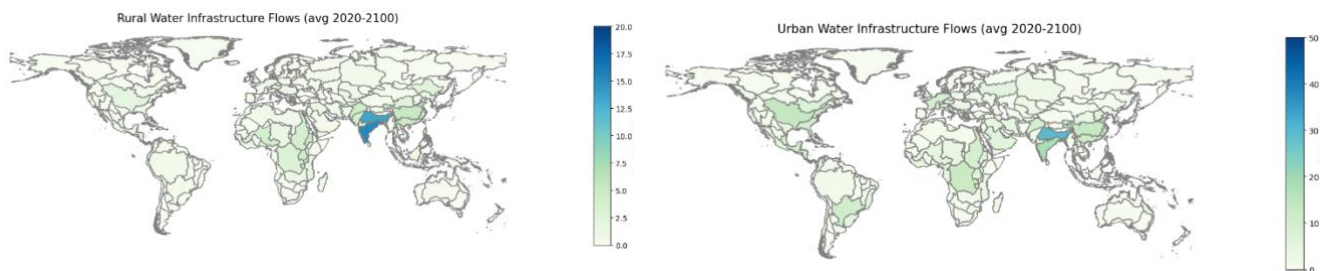

**Figure S7** Average Urban & rural water transmission

### S3.4 Recycled wastewater

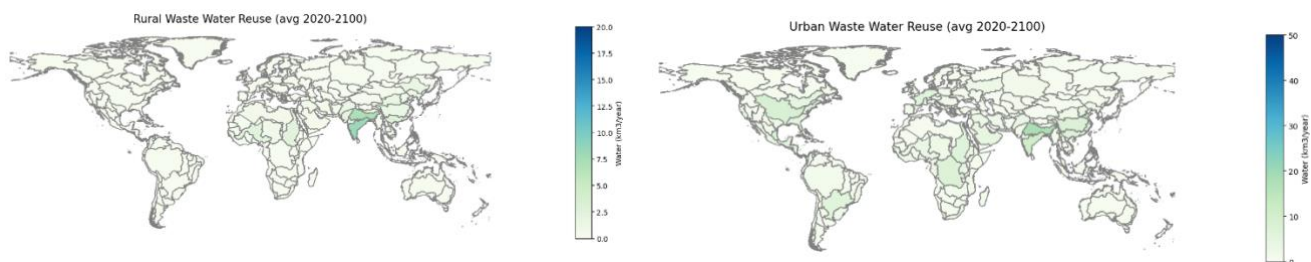

**Figure S8** Average wastewater reuse available as additional supply in the supply system

## S4 Biophysical Climate Impacts

### S4.1 Water Sector

65

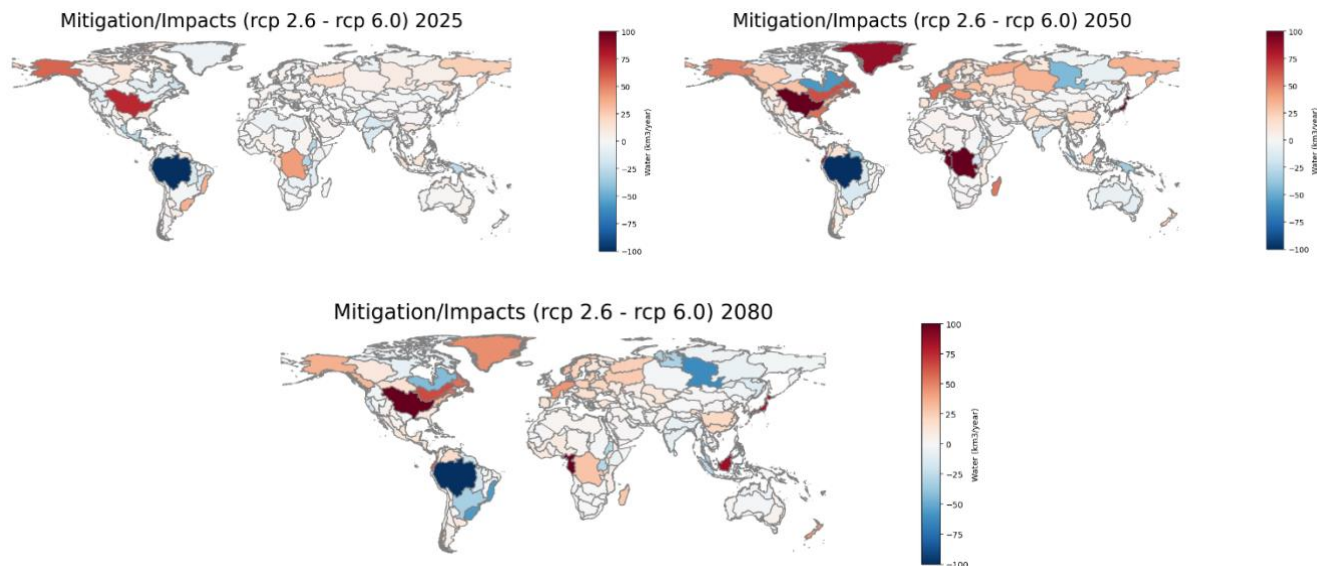

**Figure S9** Water Resources (surface water & groundwater) variation between rcp 6 & rcp 2.6 scenarios

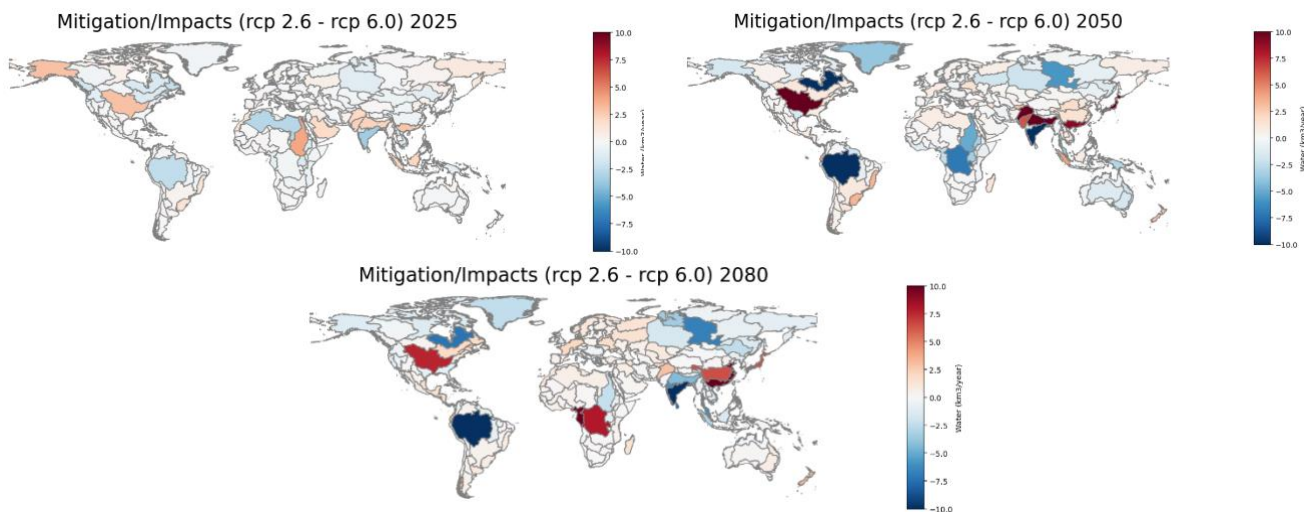

**Figure S10** Water extraction (all sectors) variation between rcp 6 & rcp 2.6 scenarios



### Water extraction (avg 2030-2070)

km<sup>3</sup>/yr

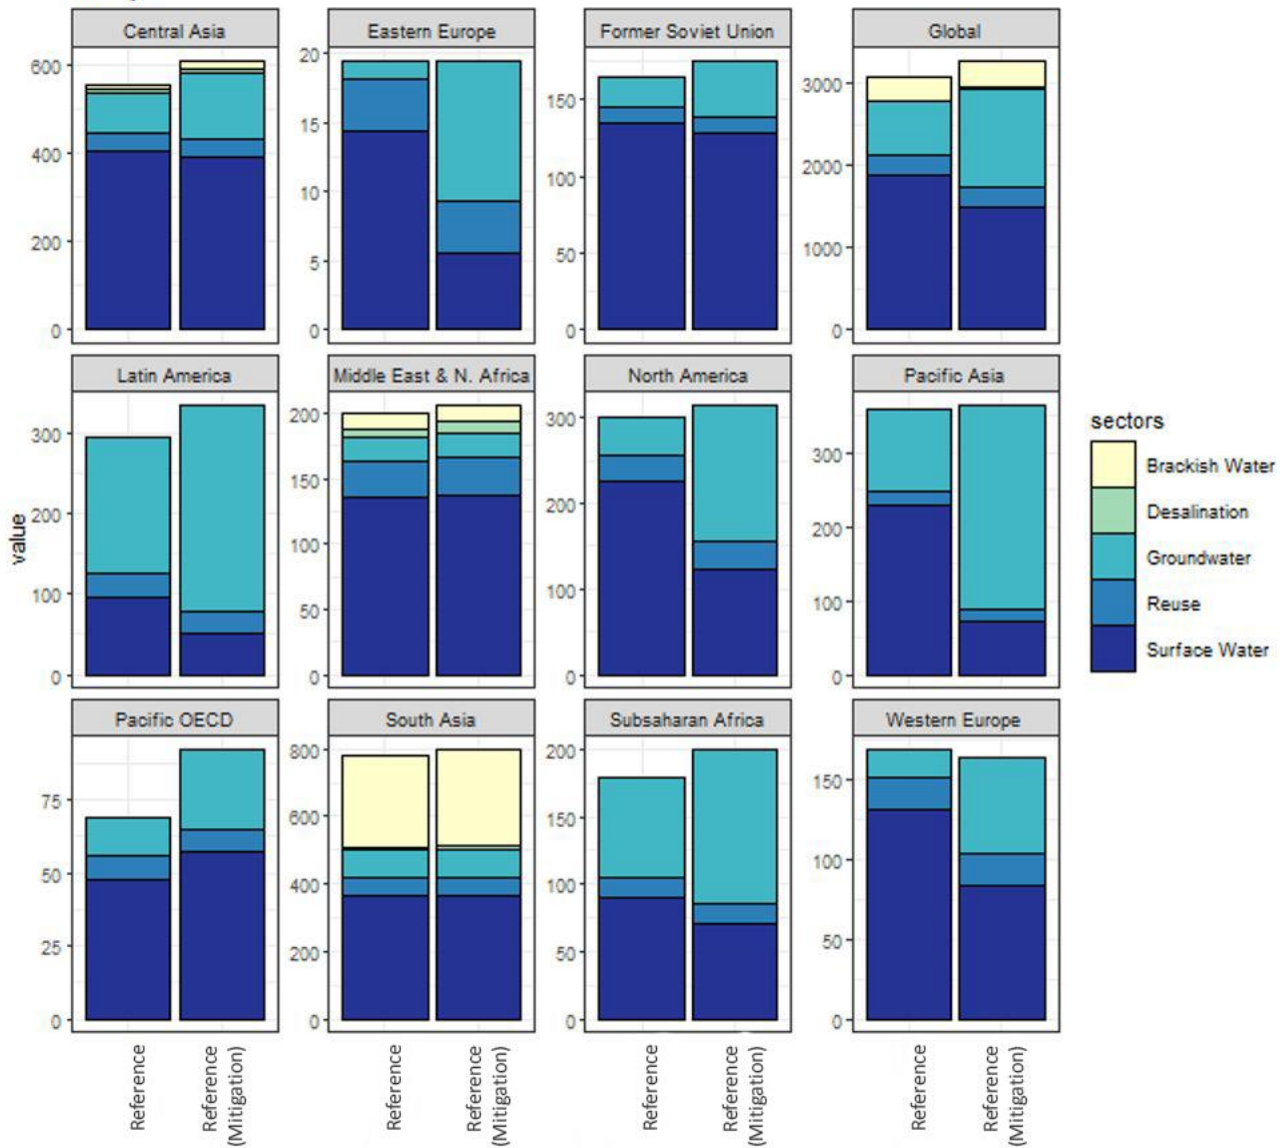

70 **Figure S11** Water Extraction outlook for no climate feedback scenarios

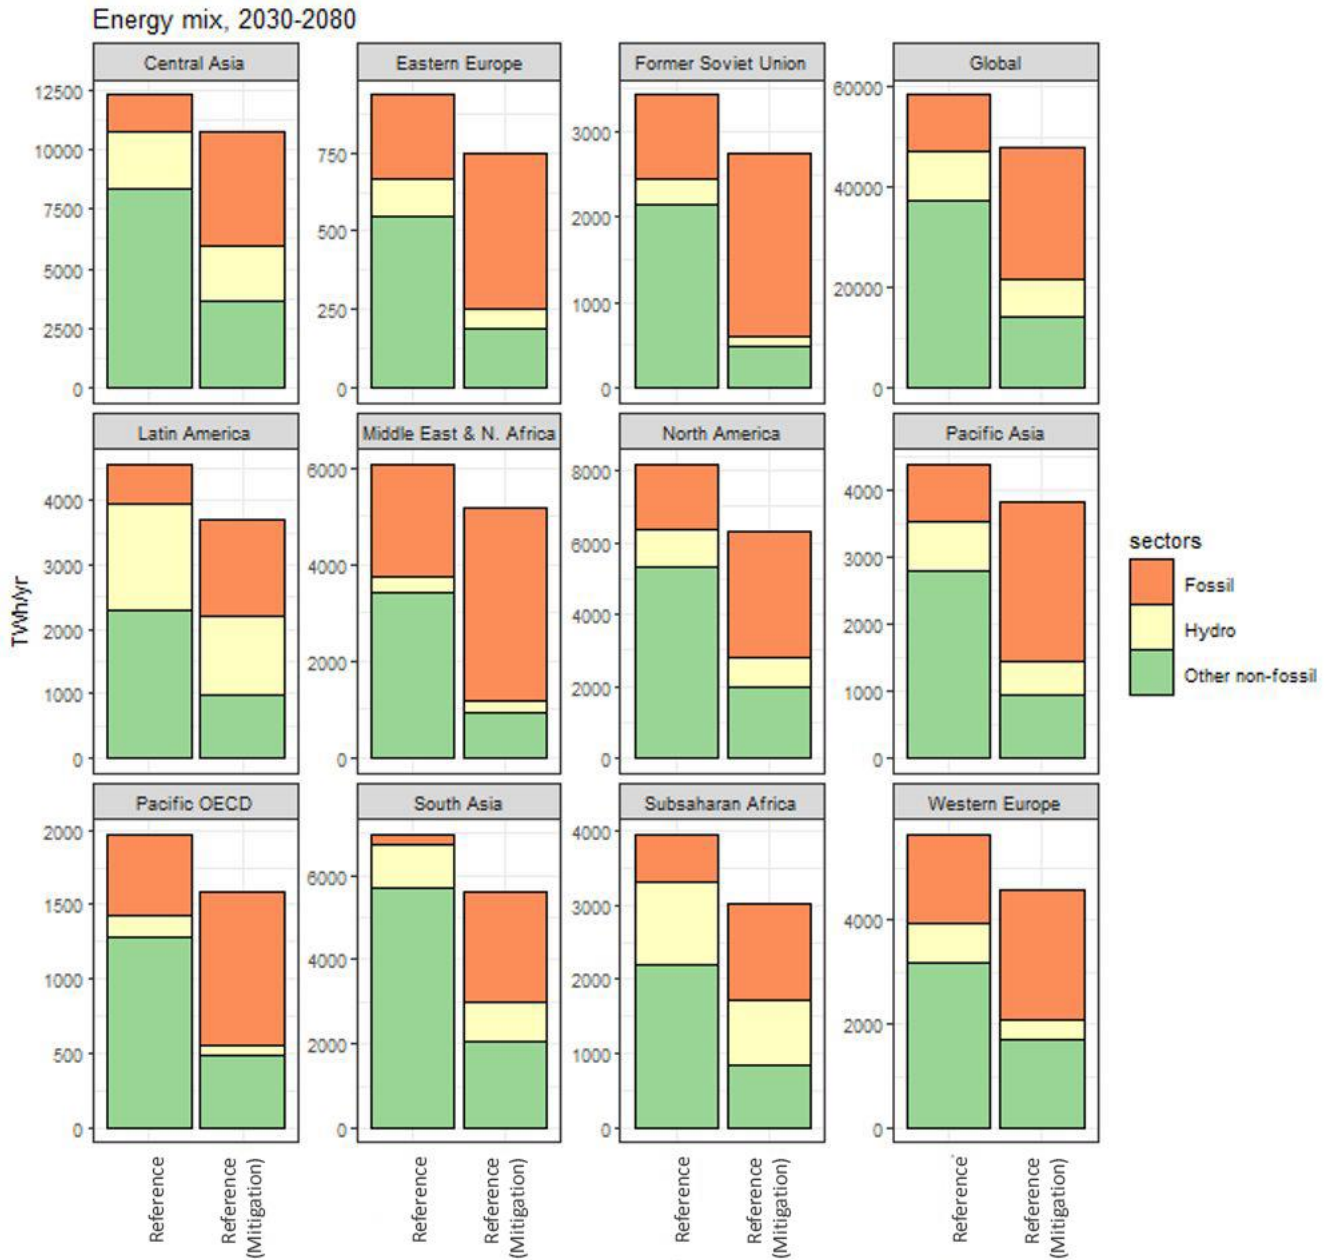

80 **Figure S12** Energy Generation mix for no climate feedback scenarios

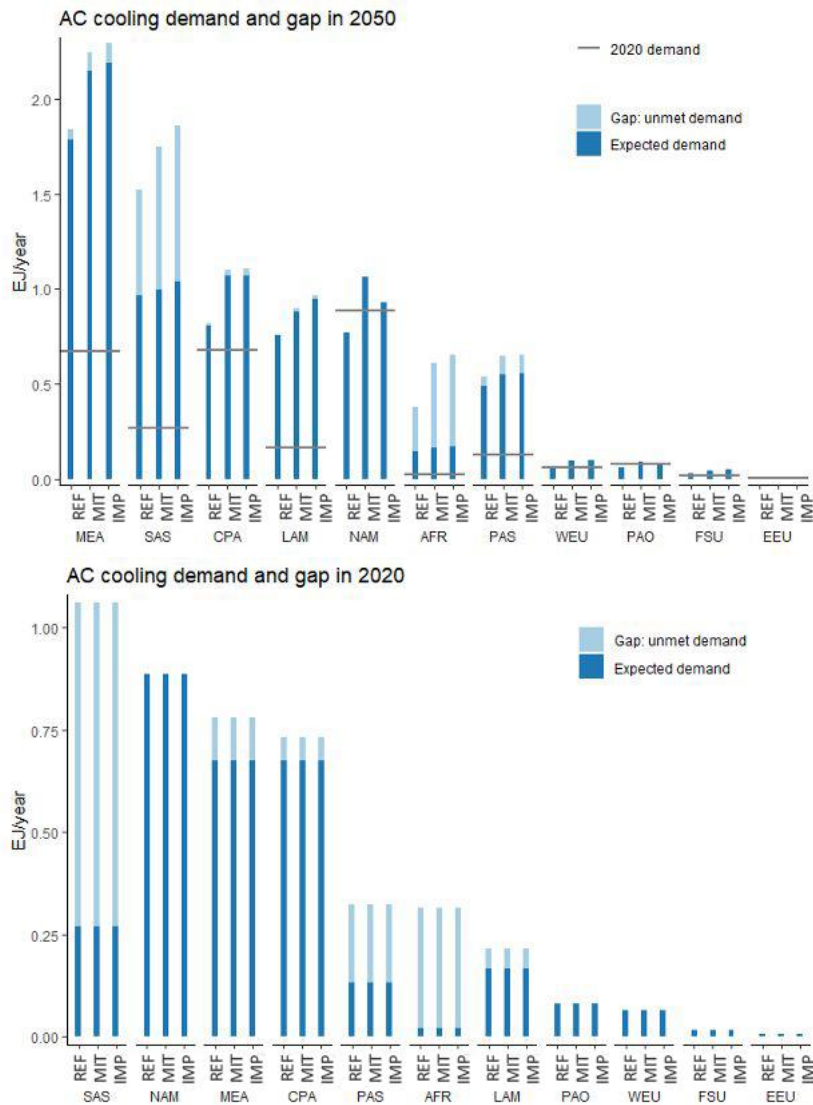

85

**Figure S13** A/C cooling demand

Cooling technology Investment (avg 2030-2080)

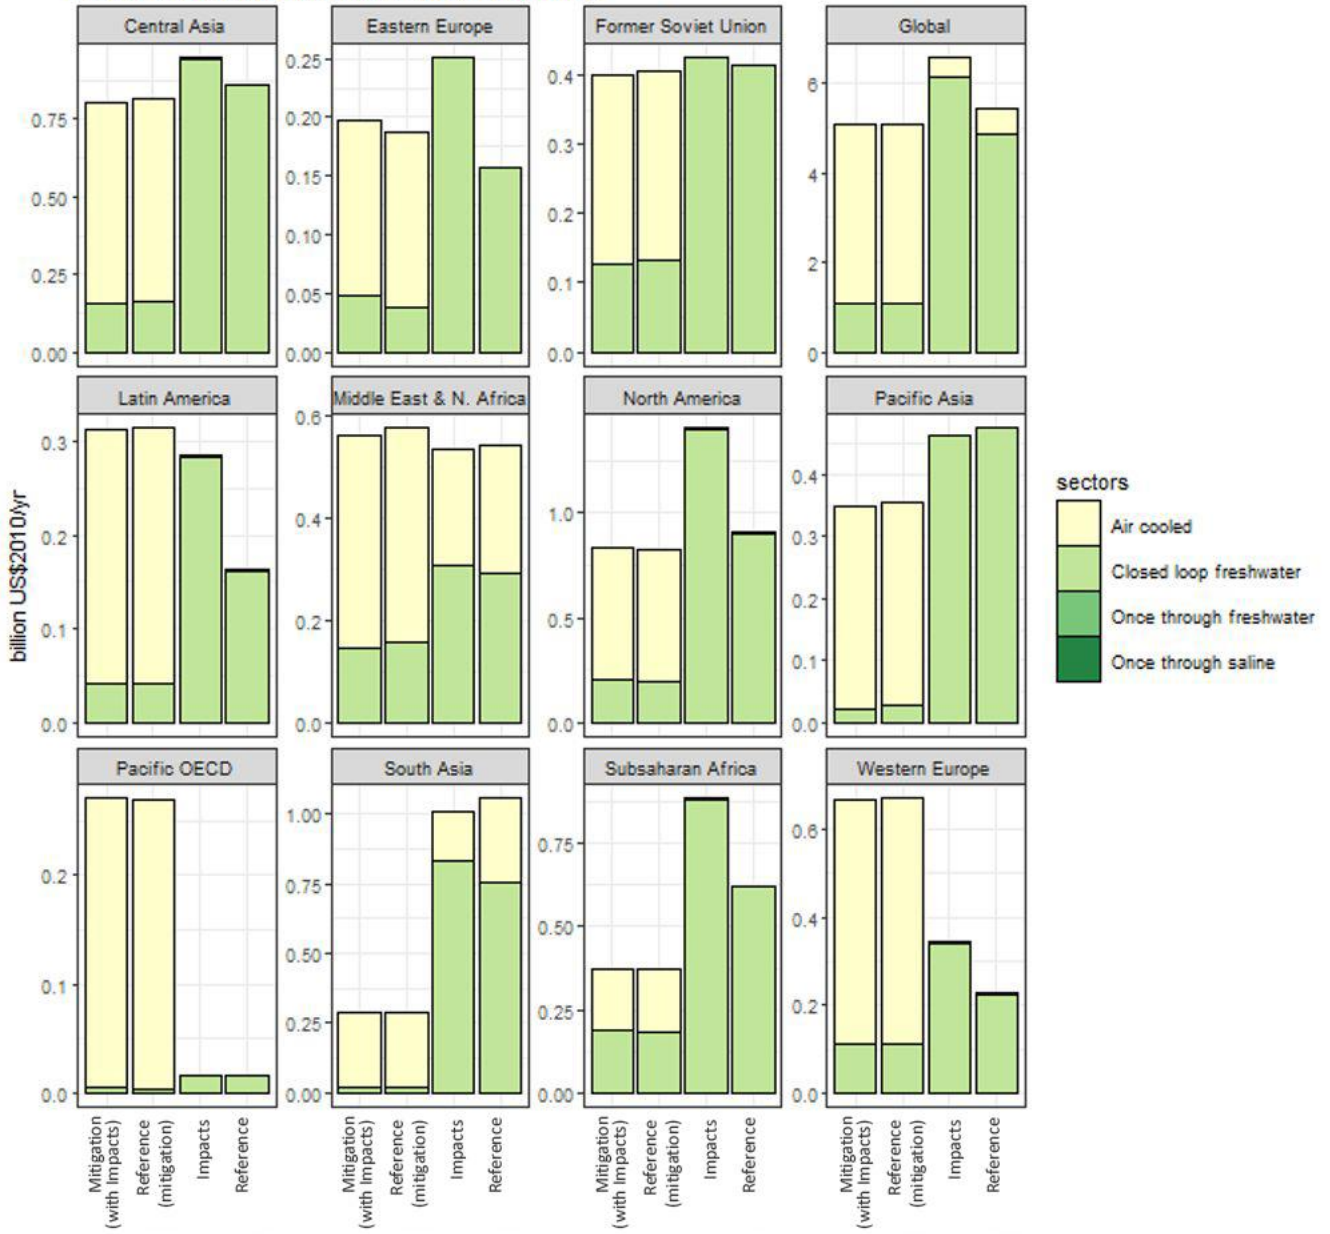

Figure S14 Climate impact on cooling water discharge

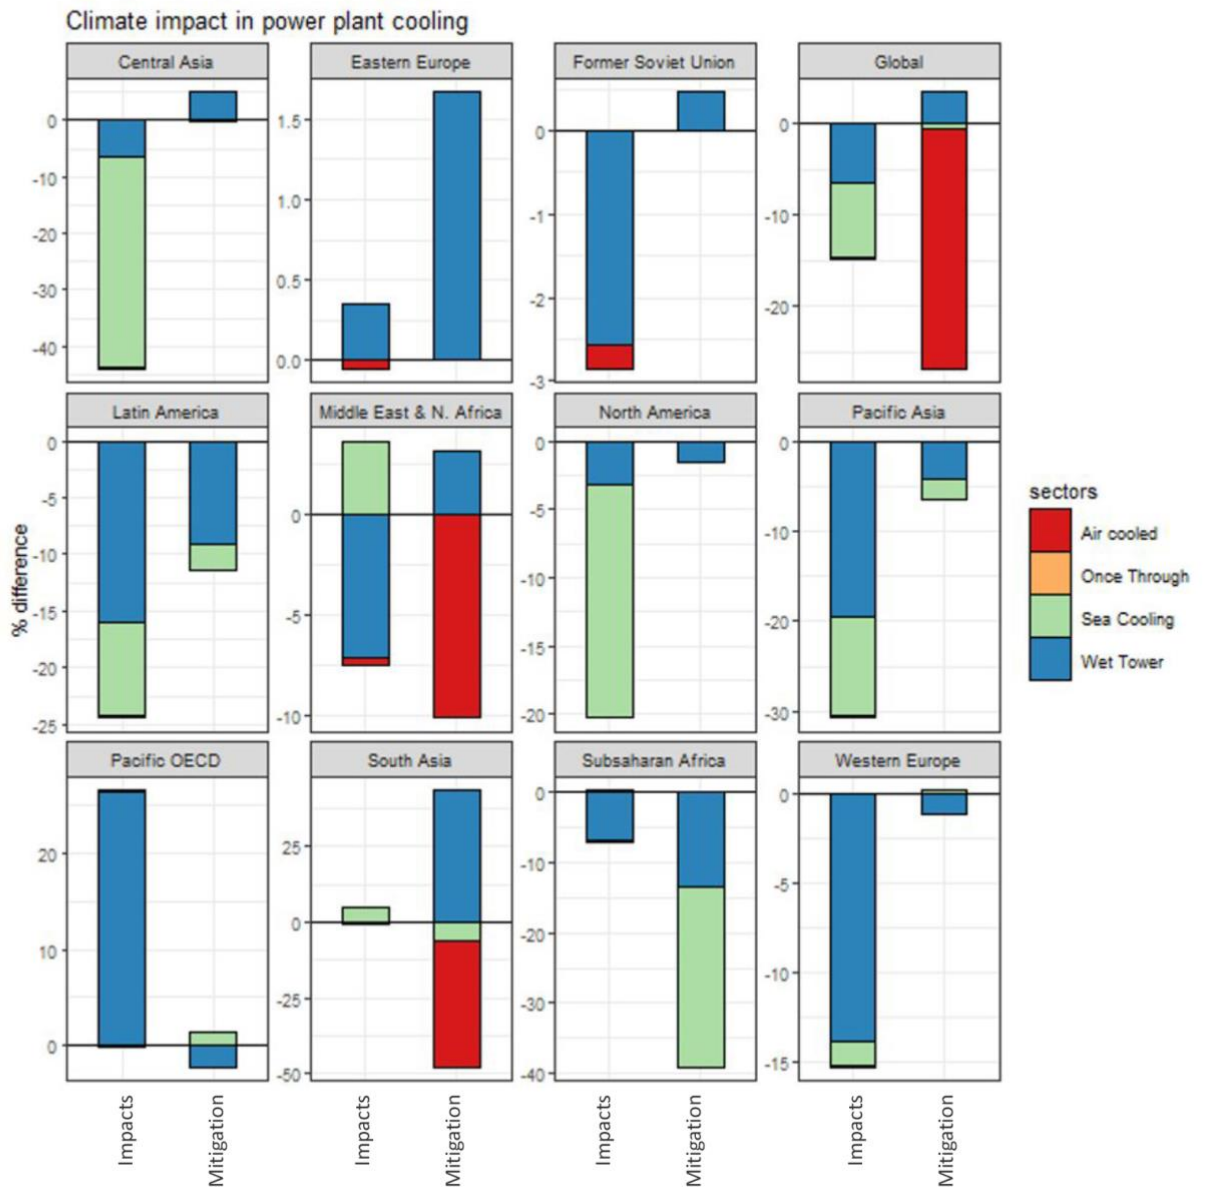

95 **Figure S15** Percentage of investments of climate impacts on cooling water discharge

## S5 Flexibility across scales

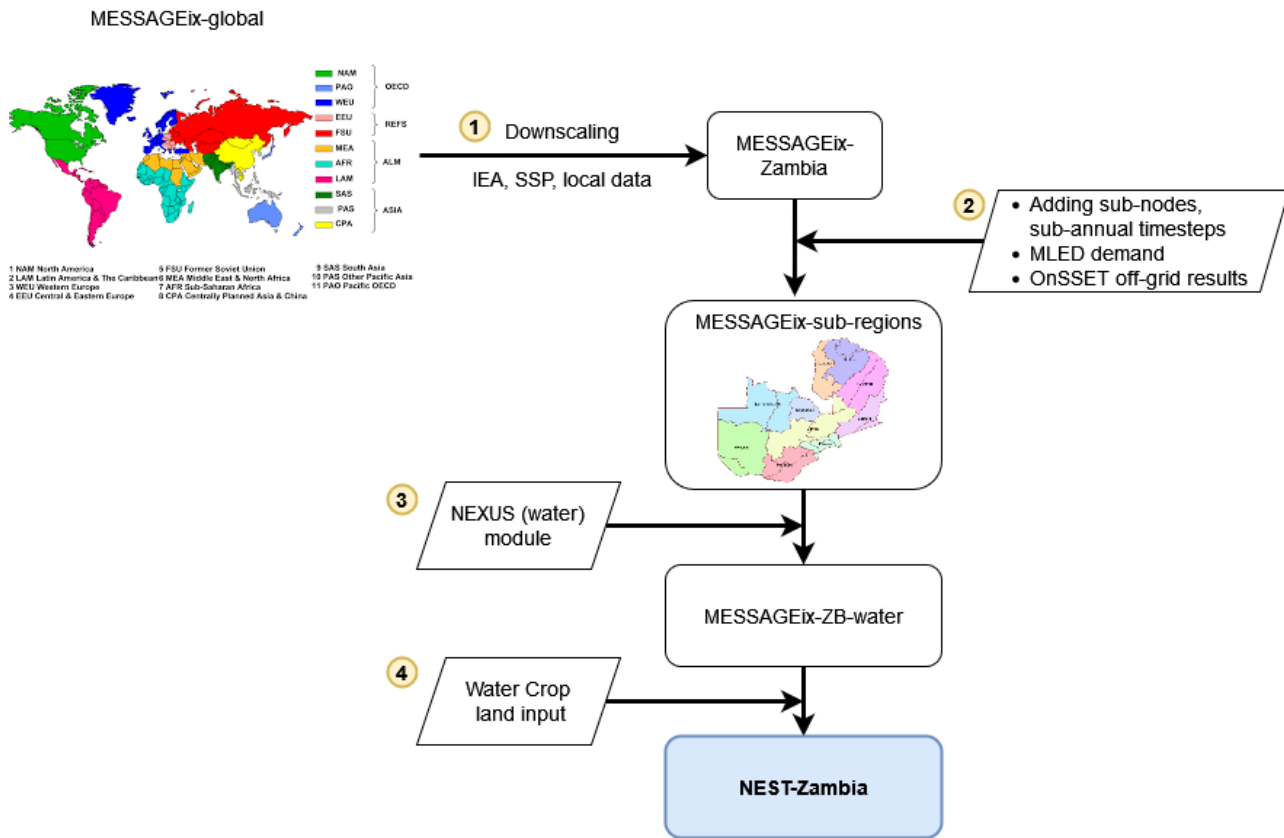

100

**Figure S16** Downscaling global nexus module at national scale
